# Supplementary material for: M. le comte [Maurice] Jaclot de Potier, président du Ice skating club [de Paris] : [photographie de presse] / [Agence Rol]
Source: Springer Nature journal article supplement (doi:10.1186/s12874-019-0853-2), 1919-01-01
Supplement: MOESM1 [file 17439934]

## Additional file 1: Calculation of the CUSUM score

### Preliminaries and notation

- $Z_r$  and  $Z_d$  are gamma distributed frailties for revision and mortality in the competing risks model with proportional hazards;
- It is assumed that  $\mathbb{E}Z_r = \mathbb{E}Z_d = 1$ ,  $\text{Var}Z_r = \sigma_r^2$ ,  $\text{Var}Z_d = \sigma_d^2$ , and  $\text{Corr}(Z_r, Z_d) = \rho$ . The dependence between  $Z_r$  and  $Z_d$  is constructed through

$$\begin{aligned} Z_r &= \frac{m_0}{m_r} Y_0 + Y_r, \\ Z_d &= \frac{m_0}{m_d} Y_0 + Y_d, \end{aligned}$$

where  $Y_j$  are independent gamma distributed random variables,  $Y_j \sim G(l_j, m_j)$ ,  $j = 0, r, d$ , with  $l_0 = \rho/\sigma_r\sigma_d$ ,  $l_j = 1/\sigma_j^{-2} - l_0$ ,  $m_j = 1/\sigma_j^2$ ,  $j = r, d$ ,  $m_0 = m_r$ ,  $0 \leq \rho \leq \min(\sigma_r/\sigma_d, \sigma_d/\sigma_r)$ ;

- Conditional bivariate survival function is given by

$$\begin{aligned} S(t_r, t_d | \mathbf{u}_r, \mathbf{u}_d, Z_r, Z_d) \\ = \exp(-Z_r \chi(\mathbf{u}_r) H_r(t_r) - Z_d \chi(\mathbf{u}_d) H_d(t_d)); \end{aligned}$$

- Cause-specific cumulative function and the marginal survival function for latent time-to-failure  $t_f$  and the vector of covariates  $\mathbf{u}_f$ ,  $f = r, d$ , are given by

$$\begin{aligned} H_f(t) &= \int_0^t \mu_{0,f}(\tau) d\tau, \\ S_f(t | \mathbf{u}_f) &= (1 + \sigma_f^2 e^{\beta^* \mathbf{u}_f} H_f(t))^{-1/\sigma_f^2}. \end{aligned}$$

- Throughout, symbol “h” denotes a hypothesis, symbol “i” a patient, “j” a particular unit, and  $J$  is a number of units.
- Baseline hazard function for hypothesis  $H_h$ ,  $h = 0, 1$ , is given by relation  $\mu_{0,f}^h(t) = \text{HR}_f^h \mu_{0,f}(t)$ ,  $f = r, d$ .
- We define a cause-specific hazard ratio under hypothesis  $h$ ,  $H_f(h, t_f, \mathbf{u}_f) = \text{HR}_f \exp(\beta_f \mathbf{u}_f) H_f(t_f)$ ,  $\tilde{H}_{jf,h} = 1 + \sigma_f^2 \sum_{i \in I_j(T)} H_f(h, t_{jif}, \mathbf{u}_{jif})$ ,  $\tilde{H}_{j0,h} = \tilde{H}_{jr,h} + \tilde{H}_{jd,h} - 1$ .

- For a time interval  $T$ , let  $I_j(T)$  be a set of individuals from unit  $j$  whose implants are in use during the period  $T$ , and  $I = I(T) = \bigcup I_j(T)$ .
- $\binom{n}{k} = n!/(n-k)!k!$  is a binomial coefficient and  $(a)_n = \Gamma(a+n)/\Gamma(a)$  is a Pochhammer's symbol.
- The numbers of revisions and deaths in a unit  $j$  during interval  $T$  are denoted by  $O_{I_{jr}}$ ,  $O_{I_{jd}}$ , respectively, and the totals are given by  $O_{Ir} = \sum_j O_{I_{jr}}$  and  $O_{Id} = \sum_j O_{I_{jd}}$ .

### Calculation of the score $X_I(T)$ in the general case of competing risks

The contribution  $\mathcal{L}_j^h(T)$  of the period  $T$  to the likelihood is equal to

$$\begin{aligned}
\mathcal{L}_j^h(T) &= \mathbb{E} \prod_{i \in I_j(T)} \mathcal{L}^h(t_{jir}, t_{jid} | \mathbf{u}_{jir}, \mathbf{u}_{jid}, Z_{jr}, Z_{jd}) \\
&= \mathbb{E} \prod_{i \in I_j(T)} \left( -\frac{\partial}{\partial t_{jir}} \right)^{\delta_{jir}} \left( -\frac{\partial}{\partial t_{jid}} \right)^{\delta_{jid}} S^h(t_{jir}, t_{jid} | \mathbf{u}_{jir}, \mathbf{u}_{jid}, Z_{jr}, Z_{jd}) \\
&= (-1)^{O_{I_{jr}}} (-1)^{O_{I_{jd}}} \tilde{H}_{jr,h}^{-l_r} \tilde{H}_{jd,h}^{-l_d} \tilde{H}_{j0,h}^{-l_0} H R_r^{O_{I_{jr}}} H R_d^{O_{I_{jd}}} \\
&\times (\sigma_r^2)^{O_{I_{jr}}} (\sigma_d^2)^{O_{I_{jd}}} \prod_{i \in I_j(T)} e^{\delta_{jir} \beta_{jir} \mathbf{u}_{jir}} e^{\delta_{jid} \beta_{jid} \mathbf{u}_{jid}} \mu_{0,r}(t_{jir})^{\delta_{jir}} \mu_{0,d}(t_{jid})^{\delta_{jid}} \\
&\times \sum_{i_r=0}^{O_{I_{jr}}} \sum_{i_d=0}^{O_{I_{jd}}} \binom{O_{I_{jr}}}{i_r} \binom{O_{I_{jd}}}{i_d} (l_r)_{i_r} (l_d)_{i_d} (l_0)_{O_{I_{jr}}+O_{I_{jd}}-i_r-i_d} \tilde{H}_{jr,h}^{-i_r} \tilde{H}_{jd,h}^{-i_d} \tilde{H}_{j0,h}^{i_r+i_d-O_{I_{jr}}-O_{I_{jd}}}.
\end{aligned}$$

The score  $X_I(T)$  for period  $T$  is given by

$$X_I(T) = \sum_{j=1}^J \log \left( \frac{\mathcal{L}_j^1(T)}{\mathcal{L}_j^0(T)} \right) \quad (1)$$

### The case of independent competing risks

If revision and death are independent events ( $\rho = 0$ ) then  $l_0 = 0$ ,  $(l_0)_k = 0$  for  $k > 0$ , and

$$\begin{aligned}
\mathcal{L}_j^h(T) &= \mathbb{E} \prod_{i \in I_j(T)} \left( -\frac{\partial}{\partial t_{jir}} \right)^{\delta_{jir}} S_r^h(t_{jir} | \mathbf{u}_{jir}, Z_{jr}) \\
&\times \mathbb{E} \prod_{i \in I_j(T)} \left( -\frac{\partial}{\partial t_{jid}} \right)^{\delta_{jid}} S_d^h(t_{jid} | \mathbf{u}_{jid}, Z_{jd}) = \mathcal{L}_{jr}^h(T) \mathcal{L}_{jd}^h(T),
\end{aligned}$$

where

$$\mathcal{L}_{j,f}^h(T) = (-1)^{O_{I_{j,f}}} \tilde{H}_{j,f,h}^{-l_f - O_{I_{j,f}}} HR_f^{O_{I_{j,f}}} (\sigma_f^2)^{n_{j,f}} (l_f)_{n_{j,f}} \prod_{i \in I_j(T)} e^{\delta_{j,i,f} \beta_{j,i,f} \mathbf{u}_{j,i,f}} \mu_{0,f}(t_{j,i,f})^{\delta_{j,i,f}}$$

for  $f = r, d$ . Formula (1) can be rewritten as

$$X_I(T) = \sum_{j=1}^J \log \left( \frac{\mathcal{L}_{j,r}^1(T)}{\mathcal{L}_{j,r}^0(T)} \right) + \sum_{j=1}^J \log \left( \frac{\mathcal{L}_{j,d}^1(T)}{\mathcal{L}_{j,d}^0(T)} \right) = X_{I,r}(T) + X_{I,d}(T),$$

where

$$\begin{aligned} X_{I,f} &= \sum_{j=1}^J \log \left( \frac{\mathcal{L}_{j,f}^1(T)}{\mathcal{L}_{j,f}^0(T)} \right) = \sum_{j=1}^J \log \left( \frac{HR_f^{O_{I_{j,f}}} \tilde{H}_{j,f,1}^{-l_f - O_{I_{j,f}}}}{\tilde{H}_{j,f,0}^{-l_f - n_{j,f}}} \right) \\ &= \log(HR_f) \sum_{j=1}^J O_{I_{j,f}} - \sum_{j=1}^J \log(\sigma_f^{-2} + O_{I_{j,f}}) \left( \frac{\tilde{H}_{j,f,1}}{\tilde{H}_{j,f,0}} \right) \\ &= O_{I_f} \log(HR) - \\ &\quad \sum_{j=1}^J (\sigma_f^{-2} + O_{I_{j,f}}) \log \left( \frac{1 + \sigma_f^2 HR_f \sum_{i \in I_j(T)} e^{\beta_{j,i,f}^* \mathbf{u}_{j,i,f}} (H_f(t_{j,2i,f} - t_{j,0i,f}) - H_f(t_{j,1i,f} - t_{j,0i,f}))}{1 + \sigma_f^2 \sum_{i \in I_j(T)} e^{\beta_{j,i,f}^* \mathbf{u}_{j,i,f}} (H_f(t_{j,2i,f} - t_{j,0i,f}) - H_f(t_{j,1i,f} - t_{j,0i,f}))} \right) \\ &= O_{I_f} \log(HR_f) - \\ &\quad \sum_{j=1}^J (\sigma_f^{-2} + O_{I_{j,f}}) \log \left( \frac{1 + \sigma_f^2 HR_f \sum_{i \in I_j(T)} e^{\beta_{j,i,f}^* \mathbf{u}_{j,i,f}} \lambda_f^{-k_f} ((t_{j,2i,f} - t_{j,0i,f})^{k_f} - (t_{j,1i,f} - t_{j,0i,f})^{k_f})}{1 + \sigma_f^2 \sum_{i \in I_j(T)} e^{\beta_{j,i,f}^* \mathbf{u}_{j,i,f}} \lambda_f^{-k_f} ((t_{j,2i,f} - t_{j,0i,f})^{k_f} - (t_{j,1i,f} - t_{j,0i,f})^{k_f})} \right) \end{aligned}$$

and  $(t_{j,1i,f}, t_{j,2i,f})$  is an intersection of the interval  $T$  with the life time of the prosthesis  $i$  implanted at  $t_{j,0i,f}$  (or with the life time of the respective patient if  $f = d$ ).

*Remark.* If the shape parameter  $k_f$  depends on covariates in the form of  $k_f(\mathbf{u}_f) = \exp(\beta_{k_f}^* \mathbf{u}_f) k_f$ , substitute  $k_f(\mathbf{u}_f)$  for  $k_f$  in the above derivation to obtain

$$\begin{aligned} X_{I,f}(T) &= O_{I_f} \log(HR_f) - \sum_{j=1}^J (\sigma_f^{-2} + O_{I_{j,f}}) \\ &\quad \times \log \left( \frac{1 + \sigma_f^2 HR_f \sum_{i \in I_j(T)} e^{\beta_{j,i,f}^* \mathbf{u}_{j,i,f}} \lambda_f^{-k_f(\mathbf{u}_{j,i,f})} ((t_{j,2i,f} - t_{j,0i,f})^{k_f(\mathbf{u}_{j,i,f})} - (t_{j,1i,f} - t_{j,0i,f})^{k_f(\mathbf{u}_{j,i,f})})}{1 + \sigma_f^2 \sum_{i \in I_j(T)} e^{\beta_{j,i,f}^* \mathbf{u}_{j,i,f}} \lambda_f^{-k_f(\mathbf{u}_{j,i,f})} ((t_{j,2i,f} - t_{j,0i,f})^{k_f(\mathbf{u}_{j,i,f})} - (t_{j,1i,f} - t_{j,0i,f})^{k_f(\mathbf{u}_{j,i,f})})} \right). \end{aligned}$$

The full score  $X_I(T)$  is an additive function of the partial scores and expression for  $X_{I,f}(T)$  depends only on  $HR_f$  and does not depend on the hazard

ratio for the competing cause of failure. That is, if we are interested only in the changes of  $HR_r$ , we can carry out the CUSUM analysis based only on the values of  $X_{I,r}(T)$ .
